# Supplementary material for: Effect of an Anhydride Excess on the Curing Kinetics and Dynamic Mechanical Properties of Synthetic and Biogenic Epoxy Resins
Source: Hindawi journal article supplement (doi:10.1155/2019/5029153), 2019-05-26

## Supplementary information

### Effect of an anhydride excess on the curing kinetics and dynamic-mechanical properties of synthetic and biogenic epoxy resins

Facundo I. Altuna,<sup>1,2</sup> Carmen C. Riccardi,<sup>2</sup> Diana C. Marín Quintero,<sup>1,3</sup>  
Roxana A. Ruseckaite,<sup>1</sup> and Pablo M. Stefani<sup>1</sup>

<sup>1</sup> Ecomaterials Division, Institute of Materials Science and Technology (INTEMA), University of Mar del Plata and National Research Council (CONICET), Av. J. B. Justo 4302, 7600 Mar del Plata, Argentina

<sup>2</sup> Nanostructured Polymers Division, Institute of Materials Science and Technology (INTEMA), University of Mar del Plata and National Research Council (CONICET), Av. J. B. Justo 4302, 7600 Mar del Plata, Argentina

<sup>3</sup> Division of Biocomposites, Department of Fibre and Polymer Technology, KTH Royal Institute of Technology, School of Engineering Sciences in Chemistry, Biotechnology and Health, Teknikringen 56, Stockholm SE-100 44, Sweden

DSC thermograms for the curing of DGEBA and ESO with MTHPA and 1MI with different stoichiometric ratios  $R$ , at heating rate ( $q$ ) of 2, 5 and 20 °C/min.

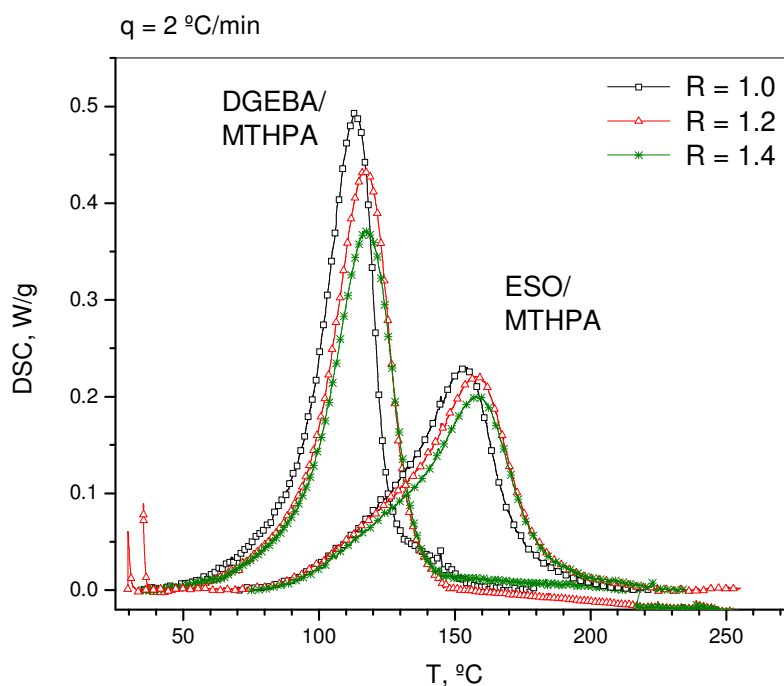

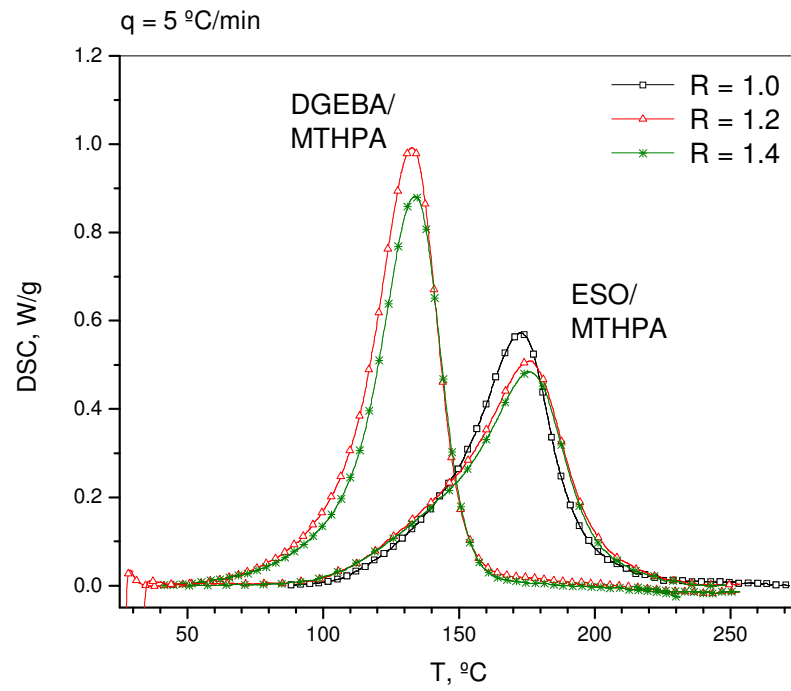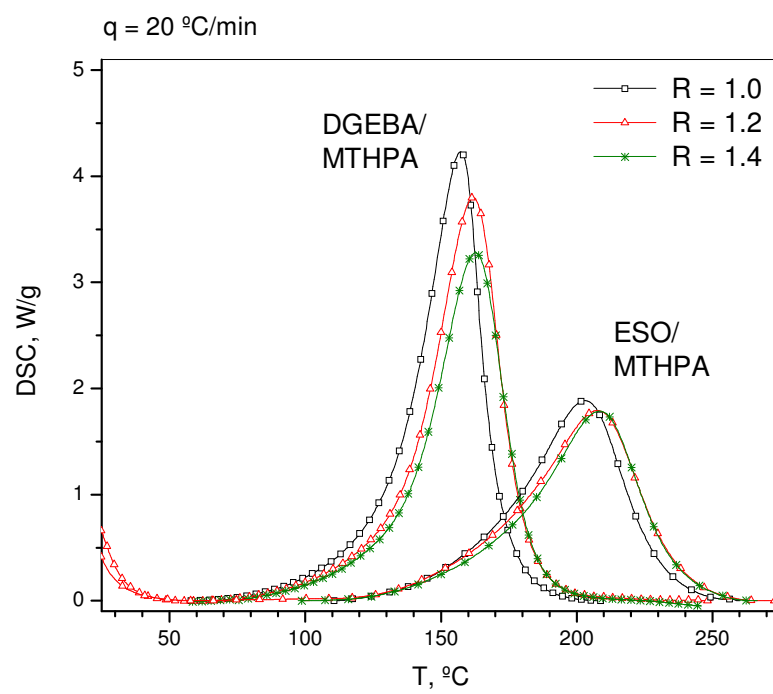

Supplement: f1 [file 5029153.f1.pdf]
